1 **Identification of cereulide producing *Bacillus cereus* by MALDI-TOF MS**

2

3 Sebastian Ulrich<sup>1\*</sup>, Christoph Gottschalk<sup>1</sup>, Richard Dietrich<sup>2</sup>, Erwin Märtlbauer<sup>2</sup>, Manfred Gareis<sup>1</sup>

4

5 <sup>1</sup>Chair of Food Safety, Veterinary Faculty, Ludwig-Maximilians-University Munich,

6 Schoenleutnerstr. 8, 85764 Oberschleissheim, Germany

7

8 <sup>2</sup>Chair for Hygiene and Technology of Milk, Veterinary Faculty, Ludwig-Maximilians-University

9 Munich, Schoenleutnerstr. 8, 85764 Oberschleissheim, Germany

10

11 \*Corresponding author:

12 Sebastian Ulrich

13 Chair of Food Safety

14 Faculty of Veterinary Medicine

15 LMU Munich

16 Schoenleutnerstr. 8

17 85764 Oberschleissheim, Germany

18 Telephone: +49 (0)89 2180 78533

19 Fax: +49 (0)89 2180 78502

20 e-mail: [ulrich@ls.vetmed.uni-muenchen.de](mailto:ulrich@ls.vetmed.uni-muenchen.de)

21

22 Acknowledgements

23 Sponsored by the Adalbert Raps foundation, Kulmbach, Germany. Any opinions expressed here are  
24 those of the authors.

25 **Abstract**

26

27 The *Bacillus (B.) cereus* group is genetically highly homogenous and consists of nine recognized  
28 species which are present worldwide. *B. cereus* sensu stricto play an important role in food-borne  
29 diseases by producing different toxins. Yet, only a small percentage of *B. cereus* strains are able to  
30 produce the heat stable depsipeptide cereulide, the causative agent of emetic food poisonings. To  
31 minimize the entry of emetic *B. cereus* into the food chain, food business operators are dependent on  
32 efficient and reliable methods enabling the differentiation between emetic and non-emetic strains.

33 Currently, only time-consuming cell bioassays, molecular methods and tandem mass spectrometry are  
34 available for this purpose. Thus, the aim of the present study was to establish a fast and reliable  
35 method for the differentiation between emetic and non-emetic strains by MALDI-TOF MS. Selected  
36 isolates/strains of the *B. cereus* group (total n=110, i.e. emetic n=45, non-emetic n=65) were cultured  
37 on sheep blood agar for 48h.

38 Subsequently, the cultures were directly analyzed by MALDI-TOF MS without prior extraction steps  
39 (direct smear method). The samples were measured in linear positive ionization mode in the mass  
40 range of  $m/z$  800 – 1,800 Da. Using ClinProTools 3.0 statistical software and flex analyst, a  
41 differentiation between emetic and non-emetic isolates was possible with a rate of correct  
42 identification of 99.1 % by means of the evaluation of two specific biomarkers ( $m/z$  1171 and 1187  
43 Da).

44

45 **Importance**

46 *Bacillus (B.) cereus* plays an important role in food-borne diseases due to the production of different  
47 toxins, e.g. the heat stable depsipeptide cereulide. Only a small number of *B. cereus* strains are able to  
48 produce this toxin, the causative agent of emetic food poisonings. To minimize the entry of emetic *B.*  
49 *cereus* into the food chain, food business operators require efficient and reliable methods enabling the  
50 differentiation between emetic and non-emetic strains. The aim of the present study was to develop a  
51 fast and reliable method for the differentiation between emetic and non-emetic strains by MALDI-  
52 TOF MS. A differentiation between emetic and non-emetic isolates was possible with a rate of correct

53 identification of 99.1 % by means of the evaluation of two specific biomarkers ( $m/z$  1171 and 1187  
54 Da).  
55  
56 Keywords: MALDI-TOF MS, *Bacillus cereus*, cereulide, food intoxication

## 57 **Introduction**

58

59 *Bacillus* (*B.*) spp. are Gram-positive, rod shaped bacteria occurring world-wide. The *B. cereus* group is  
60 genetically highly homogeneous and comprises nine recognized species: *B. anthracis*, *B. cereus* sensu  
61 stricto, *B. cytotoxicus*, *B. mycoides*, *B. pseudomycoides*, *B. thuringiensis*, *B. toyonensis*, *B.*  
62 *weihenstephanensis* and *B. wiedmannii* (1, 2). Their spores are heat, acid, UV and desiccation resistant  
63 and survive pasteurization (3, 4).

64 Due to the persistence of spores in food and the ability of the vegetative cells to produce different  
65 toxins, isolates of the *B. cereus* group play an important role in food safety. Several publications report  
66 an increasing number of cases of foodborne intoxications caused by *B. cereus* in the last years (5, 6).  
67 Basically, toxins of the *B. cereus* group can result in two different forms of food intoxication: emetic  
68 versus diarrhea (4).

69 The diarrheal form is caused by heat-labile proteins, i.e. the two enterotoxin complexes Hbl  
70 (hemolytic enterotoxin BL) and Nhe (non-hemolytic enterotoxin) as well as cytotoxin K1 (7, 8). In  
71 contrast, the emetic form is caused by the small heat-stable cyclic depsipeptide cereulide (Figure 1),  
72 encoded by non-ribosomal peptide synthetase genes (*ces*) (9). Cereulide with no structural  
73 modification has a molecular mass of 1171 Da (10). Recently, 18 cereulide variants have been  
74 described with molecular masses varying from 1147 to 1205 Da. Interestingly, the cytotoxicity of the  
75 different analogues differs widely, for instance, the toxicity of isocereulide A is eight times higher  
76 than that of cereulide (11).

77

78 Emetic *B. cereus* strains represent a major hazard in mass catering and are frequently reported as cause  
79 of food-borne outbreaks. Cereulide formation in the digestive tract is rarely observed, if it occurs at  
80 all. Intoxication is usually caused by the ingestion of toxin preformed by *ces*-positive *B. cereus* strains  
81 in food (12). The direct identification of toxins in food can be carried out by LC-MS/MS or HPLC  
82 MS. These methods are able to identify and quantify the toxin with high a sensitivity (10, 13, 14).  
83 Generally, food matrices rich in carbohydrates, such as pasta and rice, as well as milk and dairy  
84 products have the highest risk of causing cereulide intoxications (6, 15). Symptoms are mainly  
85 characterized by vomiting shortly after ingestion of the toxin, with an average duration of one day.

86 Nevertheless, severe cases require hospitalization and several reports of fatal organ failure have been  
87 published (16-20). The detection of viable bacteria prior to toxin production in food is necessary to  
88 enable preventive measures in food businesses, such as the elimination of raw materials contaminated  
89 with potentially emetic *B. cereus* strains. Therefore, for a general improvement of food hygiene and  
90 for the application of specific hazard control plans, a differentiation between emetic and non-emetic *B.*  
91 *cereus* strains would be desirable. However, this requires the availability of a fast and reliable method  
92 enabling a high-throughput bacterial screening. Emetic and non-emetic *B. cereus* strains cannot be  
93 distinguished by cultural methods used for their isolation (7, 12) and, therefore, mostly molecular  
94 methods (21, 22) are used to differentiate *B. cereus* strains based on their genetic profile (9, 23, 24).  
95 Furthermore, HEp-2/MTS-bioassays can be used for identifying toxic and non-toxic *B. cereus* strains  
96 (25, 26). However, these methods are time consuming, difficult and expensive.

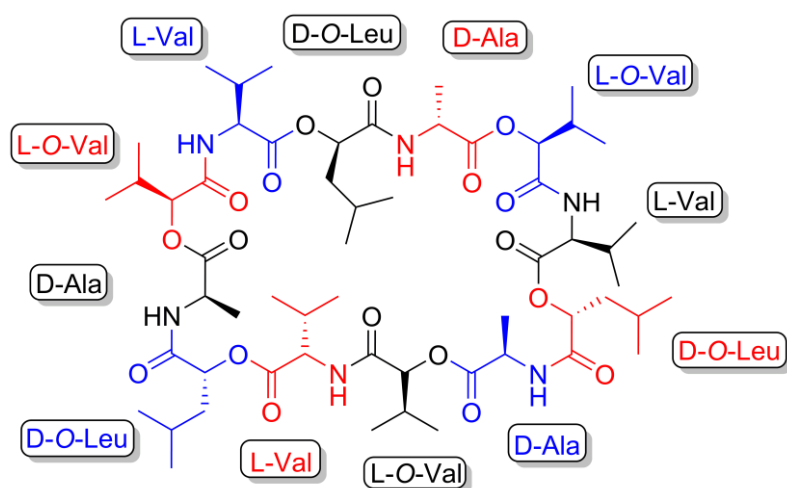

97

98 **Figure 1:** Cereulide, chemical structure of the cyclic dodecadepsipeptide

99

100 Since some years MALDI-TOF MS is widely used for routine identification of microorganisms (27).  
101 This method is extremely robust, fast and suited for operation by laboratory personnel without  
102 profound knowledge of the technique per se as the results can be automatically generated via highly  
103 sophisticated statistical software. However, previous attempts to apply this technique to identify  
104 emetic *B. cereus* were not successful (28). Fiedoruk et al. (28) described a MALDI-TOF MS approach  
105 for the differentiation of emetic and non-emetic *B. cereus* strains by measuring proteins in the mass  
106 range of  $m/z$  4000 – 12000 Da. The MALDI-TOF MS method was regarded as a promising and rapid

107 approach for pre-screening of strains, but was not considered an entirely reliable method to distinguish  
108 emetic and non-emetic *B. cereus* strains.

109 The aim of this study was to establish a MALDI-TOF MS method for a reliable differentiation  
110 between emetic and non-emetic *B. cereus* strains by directly measuring the toxin in the biomass  
111 obtained by the enrichment of *ces*-positive *B. cereus* cultured on blood-agar.

112

## 113 **Material and methods**

114

### 115 *Chemicals*

116 Columbia Agar with 5 % sheep blood was purchased from VWR (Darmstadt, Germany). The  
117 MALDI-TOF MS matrix CHCA ( $\alpha$ -cyano-4-hydroxycinnamic acid), aqua dest. and acetonitrile were  
118 purchased from Fluka (Fluka, Dagebüll, Germany). Trifluoroacetic acid (TFA) and hydrochloric acid  
119 were obtained from Merck (Merck, Hamburg, Germany). Synthetic cereulide standard was purchased  
120 from Chiralix (Netherlands), dissolved in ethanol at a concentration of 1 mg/ml and was used for  
121 evaluation of the detection limit of the applied MALDI-TOF MS approach.

122 The matrix for MALDI-TOF MS was prepared according to Meetani and Voorhees (29) by dissolving  
123 10 mg CHCA in 1 ml organic solvent (700  $\mu$ l acetonitrile, 300  $\mu$ l aqua dest., 1  $\mu$ l TFA).

124

### 125 *B. cereus* isolates

126 In total, 110 *B. cereus* strains/isolates were measured and differentiated based on their toxic potential  
127 (cereulide production). The isolates were part of the culture collection of the Chair for Hygiene and  
128 Technology of Milk (MHI, Department of Veterinary Sciences, LMU Munich). All *B. cereus* were  
129 analyzed by molecular methods (PCR assay) and bioassays (HEp-2 cytotoxicity test) for their potential  
130 to produce the emetic toxin as described in previous studies (30, 31). In Table 2 the origin of the  
131 isolates and their emetic potential are summarized. All isolates were cultured for 48 h at 37 °C on  
132 Columbia Agar with 5 % sheep blood before measurement.

133

### 134 *Protein extraction protocol*

135 A small amount (one tip of a wooden application stick) of one colony was transferred directly from the  
136 culture medium onto a ground steel target (MTP 384 target plate ground steel BC, Bruker Daltonics  
137 GmbH, Bremen, Germany). The spot was overlaid with 1  $\mu$ l matrix and air-dried at room temperature  
138 (approx. 22 °C). After the spot was dried, the sample was again overlaid by 1  $\mu$ l matrix and allowed to  
139 air-dry at room temperature.

140

#### 141 *MALDI-TOF MS measurements and data processing*

142 An Autoflex Speed MALDI-TOF/TOF MS (Bruker Daltonics GmbH, Bremen, Germany) was used  
143 for measurement. The measurements were performed in linear positive mode ( $m/z$  800 – 1,800 Da).

144 The following parameters were set: random walk of partial sample with ten shots at a raster spot with  
145 a limit diameter of 2000  $\mu$ m; sample rate and digitizer settings were set to 2.00 GS/s, the smartbeam  
146 laser was set to “flat” with a frequency of 1000.0 Hz. For automatic measurement an “AutoX” method  
147 was created using the “flex control” software. Basic laser settings were laser energy 68 - 78 % (global  
148 attenuator offset 24 %) with the following high voltage settings: ion source 1, 19.50 kV; ion source 2,  
149 18.2 kV; lens, 7.0 kV; pulsed ion extraction set to 340 ns. In total, 1000 single spectra per 200 shots  
150 were accumulated.

151 The Bacterial Test Standard (BTS) from Bruker Daltonics GmbH (mass range: 3,637.8 – 16,952.3 Da)  
152 was used as calibration standard on a regular basis once a week. With each measurement the peptide  
153 standard II from Bruker Daltonics GmbH (mass range: 700 – 3,500 Da) was used for calibration.

154

155 All isolates were cultured twice on different days (biological replicates,  $n=2$ ) and were measured eight  
156 times (technical replicates ( $n=8$ ) per biological replicate). For the differentiation of the emetic and  
157 non-emetic strains, the Genetic Algorithm of the statistical analysis software ClinProTools 3.0 (Bruker  
158 Daltonics GmbH, Bremen) was applied with the following settings: maximum of peaks: 4; maximum  
159 number of generations: 40; mutation rate: 0.2; crossover rate: 0.5. Statistical models were developed  
160 with ten emetic (class 1) and ten non-emetic (class 2) strains ( $n=20$ , 160 Spectra). For the external  
161 validation according to the software, five emetic and five non-emetic strains ( $n=10$ ,  $n=80$  mass  
162 spectra) were processed. Another set of *B. cereus* strains ( $n=80$ , 640 Spectra) was applied for

163 classification. For additional quality control all spectra were visually checked for differences in mass  
164 peaks with the “flex analyst” software (Bruker Daltoniks GmbH).

165 To obtain an impression of the sensitivity of the applied MALDI-TOF MS technique a commercially  
166 available synthetic standard was analyzed at varying concentrations. For this purpose, the cereulide  
167 standard was spotted directly onto the target and, after air drying, was overlaid with the CHCA matrix.  
168 The standard was measured in concentrations of 0.001 – 10 µg/ml.

169

## 170 **Results**

171 In a preliminary test the mass spectra of twenty *B. cereus* strains/isolates (ten emetic and non-emetic  
172 isolates each) grown on blood agar plates for 48 h were analyzed by MALDI-TOF. The processing of  
173 the mass spectra was performed by using statistical models of the ClinProTools 3.0 software. The  
174 obtained results, approved the basic applicability of the method for the differentiation of emetic and  
175 non-emetic strains (results not shown). To prove the general applicability of the developed method,  
176 further 86 *B. cereus* strains/isolates (31 emetic, 55 non-emetic) were analyzed. The analyses were  
177 performed as a blind study, i.e. the MALDI-TOF experimenter did not know the assignment of the  
178 isolates. Overall, each mass spectrum consisted of approximately 38 discernible mass peaks. Two  
179 mass peaks which consistently appeared in all mass spectra of the emetic strains were identified as  
180 having prominent intensity differences suitable for the differentiation ( $m/z$  1171 and 1187 Da). The  
181 emetic strains clearly showed the two mass peaks in their mass spectra, whereas these mass peaks  
182 were not detectable within spectra of the non-emetic strains (Figure 2a and b).

183 **a)**



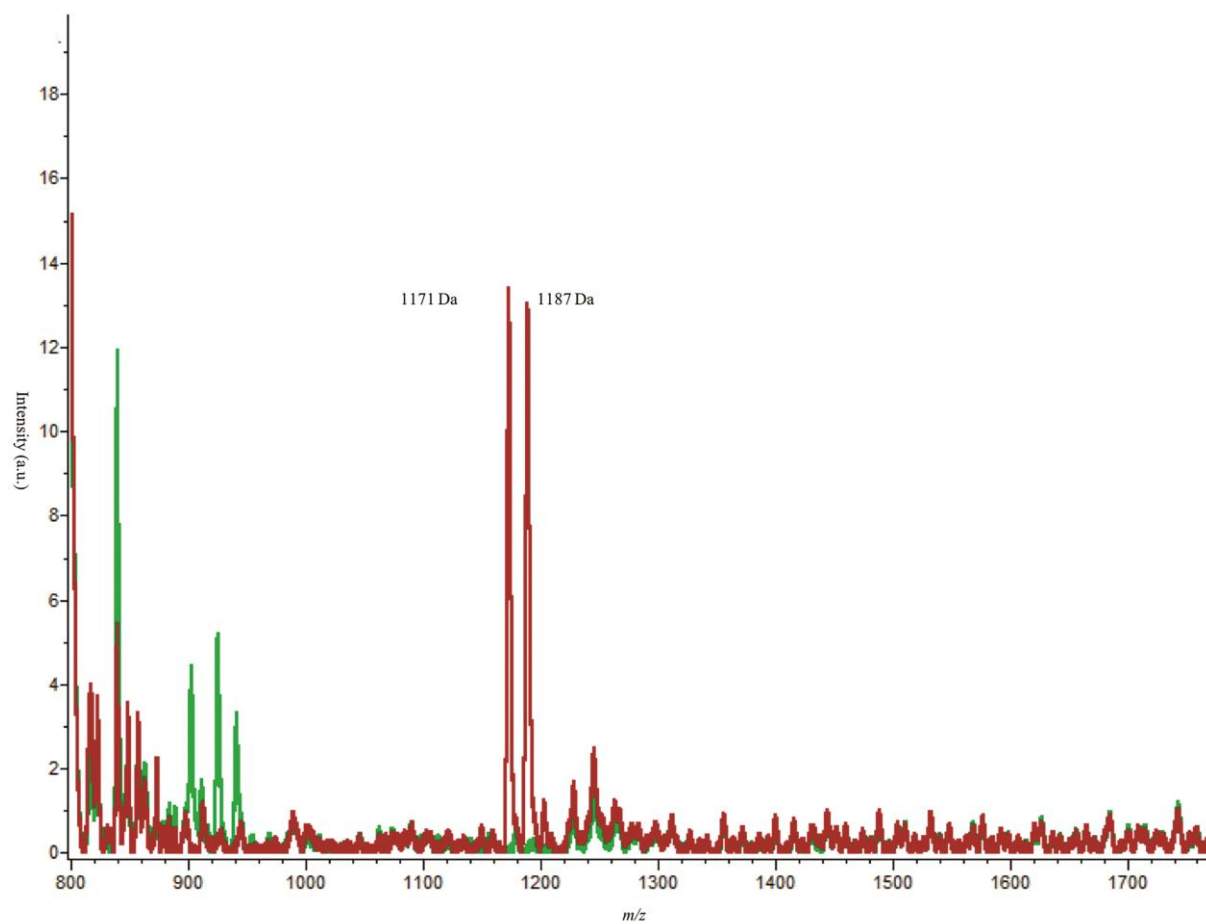

184

185

b)

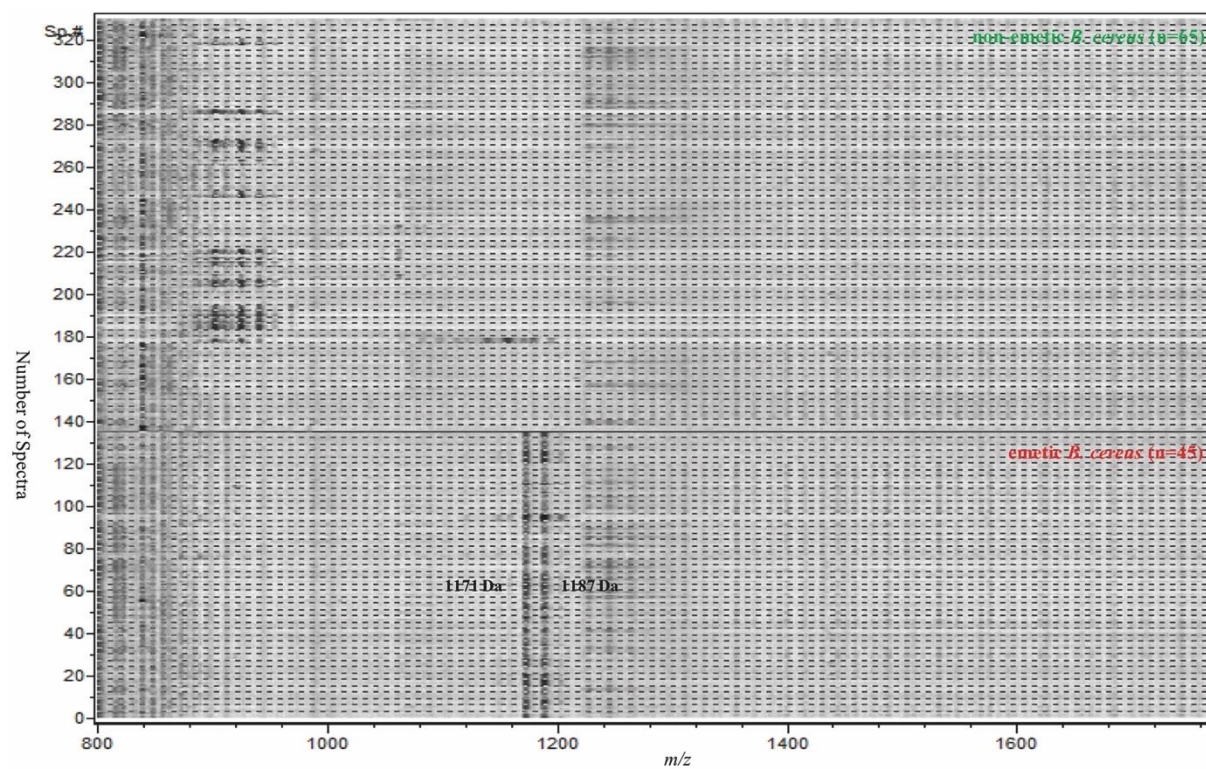

186

187

188

189 **Figure 2:** Profile of the 110 analyzed *B. cereus* strains shown as sum spectra (Fig. 2a; emetic strains  
 190 in red, non-emetic strains in green) or in band view (Fig. 2b). The analyzed *B. cereus* collection  
 191 comprised 98 isolates, 8 reference strains (see Table 3) and 4 low-producing emetic isolates (see Table  
 192 4).

193  
 194 Identification of emetic strains was achieved by evaluation of significant differences ( $p < 0.05$ ) between  
 195 the average peak intensities of the two different pools (non-emetic class 1 and emetic class 2) which  
 196 were calculated by t-test/ANOVA and the Receiver Operating Characteristic (ROC values). The mean  
 197 mass peak intensities ranged from 1.11 – 11.32 a.u. Their ROC values varied from 0.99 – 1.00 AUC  
 198 (Area Under Curve). Both mass peaks were included into the model showing significant differences in  
 199 mass peak intensities compared to the non-emetic strains. The calculated difference in average  
 200 intensities was 5.34 for the  $m/z$  1171 Da mass peak and 10.22 for the  $m/z$  1187 Da mass peak. The  
 201 relative standard deviation for the mass peak intensities varied from 0.33 – 6.72 % (Table 1)

202  
 203 **Table 1:** ClinProTools Peak Statistic for the selected mass peaks used for differentiation of non-  
 204 emetic (class 1) and emetic (class 2) *B. cereus* strains

| Mass Peak | p-value<br>t-test/ANOVA | Average intensity<br>class 1<br>(a. u.) | Average intensity<br>class 2<br>(a. u.) | Standard Deviation<br>class 1<br>(%) | Standard Deviation<br>class 2<br>(%) | Receiver Operating Characteristic (AUC) |
|-----------|-------------------------|-----------------------------------------|-----------------------------------------|--------------------------------------|--------------------------------------|-----------------------------------------|
| 1171      | <0.05                   | 1.26                                    | 6.6                                     | 0.53                                 | 2.96                                 | 0.99                                    |
| 1187      | <0.05                   | 1.11                                    | 11.32                                   | 0.33                                 | 6.72                                 | 1.00                                    |

205 a.u.: arbitrary units; AUC: Area under curve

206  
 207 Overall, the statistical model based on the average mass peak intensity differences of the above-  
 208 mentioned mass peaks enabled the reliable differentiation between emetic (41) and non-emetic (65)  
 209 strains, including eight reference strains (Table 2 and 3). All mass spectra were also evaluated by  
 210 visual control for detection of the above-mentioned mass peaks with the software “flex analysis”  
 211 (Bruker Daltonics GmbH). Altogether, a consistency of 100 % of the MALDI-TOF MS results with  
 212 the results of prior characterization of the strains was achieved.

213

214 **Table 2:** Summary of the differentiation between emetic (+) and non-emetic (-) *B. cereus* isolates by

215 MALDI-TOF MS and comparison with results of previous characterization by bioassays/PCR

| No. (MHI) | Origin | MALDI-TOF MS <sup>3</sup> | Bioassay <sup>1*</sup> /PCR <sup>2*</sup> |
|-----------|--------|---------------------------|-------------------------------------------|
| 86        | FI     | -                         | -/-                                       |
| 184       | EI     | +                         | +/+                                       |
| 280       | FI     | +                         | +/+                                       |
| 1326      | HI     | +                         | +/+                                       |
| 1471      | FI     | +                         | +/+                                       |
| 1475      | FI     | -                         | -/-                                       |
| 1476      | FI     | -                         | -/-                                       |
| 1477      | FI     | -                         | -/-                                       |
| 1478      | FI     | -                         | -/-                                       |
| 1479      | FI     | -                         | -/-                                       |
| 1481      | FI     | -                         | -/-                                       |
| 1482      | FI     | -                         | -/-                                       |
| 1483      | FI     | -                         | -/-                                       |
| 1484      | EI     | -                         | -/-                                       |
| 1485      | FI     | +                         | +/+                                       |
| 1486      | FI     | +                         | +/+                                       |
| 1487      | HI     | +                         | +/+                                       |
| 1489      | FI     | -                         | -/-                                       |
| 1490      | FI     | -                         | -/-                                       |
| 1491      | FI     | -                         | -/-                                       |
| 1492      | FI     | -                         | -/-                                       |
| 1493      | FI     | -                         | -/-                                       |
| 1494      | FI     | -                         | -/-                                       |
| 1495      | FI     | -                         | -/-                                       |
| 1496      | FI     | -                         | -/-                                       |
| 1497      | FI     | -                         | -/-                                       |
| 1499      | FI     | -                         | -/-                                       |
| 1500      | FI     | -                         | -/-                                       |
| 1501      | FI     | -                         | -/-                                       |
| 1502      | FI     | -                         | -/-                                       |
| 1503      | FI     | -                         | -/-                                       |
| 1508      | FI     | -                         | -/-                                       |
| 1509      | FI     | -                         | -/-                                       |
| 1510      | FI     | -                         | -/-                                       |
| 1511      | FI     | -                         | -/-                                       |
| 1512      | FI     | -                         | -/-                                       |
| 1513      | FI     | -                         | -/-                                       |
| 1514      | FI     | -                         | -/-                                       |
| 1515      | FI     | +                         | +/+                                       |

|      |    |   |     |
|------|----|---|-----|
| 1516 | FI | - | -/- |
| 1517 | FI | + | +/+ |
| 1518 | FI | - | -/- |
| 1519 | FI | - | -/- |
| 1520 | FI | - | -/- |
| 1521 | FI | - | -/- |
| 1522 | FI | - | -/- |
| 1523 | FI | - | -/- |
| 1524 | FI | - | -/- |
| 1525 | FI | - | -/- |
| 1526 | FI | - | -/- |
| 1527 | FI | - | -/- |
| 1528 | FI | + | +/+ |
| 1529 | FI | - | -/- |
| 1530 | FI | - | -/- |
| 1531 | FI | - | -/- |
| 1532 | FI | - | -/- |
| 1533 | FI | + | +/+ |
| 1534 | FI | + | +/+ |
| 1535 | FI | + | +/+ |
| 1538 | FI | + | +/+ |
| 1542 | FI | + | +/+ |
| 1548 | HI | + | +/+ |
| 1549 | FI | + | +/+ |
| 1550 | HI | + | +/+ |
| 1553 | FI | + | +/+ |
| 1559 | FI | + | +/+ |
| 1562 | HI | + | +/+ |
| 1566 | HI | + | +/+ |
| 1567 | HI | + | +/+ |
| 1568 | HI | - | -/- |
| 1569 | HI | + | +/+ |
| 1571 | HI | + | +/+ |
| 1654 | EI | + | +/+ |
| 1664 | FI | + | +/+ |
| 1665 | FI | + | +/+ |
| 1670 | FI | - | -/- |
| 1672 | FI | + | +/+ |
| 1673 | FI | + | +/+ |
| 1678 | FI | - | -/- |
| 1699 | FI | + | +/+ |
| 1701 | HI | + | +/+ |
| 1745 | FI | + | +/+ |
| 1885 | EI | - | -/- |
| 2011 | HI | + | +/+ |
| 2049 | HI | + | +/+ |

|      |    |   |     |
|------|----|---|-----|
| 2058 | HI | + | +/+ |
| 2350 | FI | - | -/- |
| 2507 | FI | - | -/- |
| 2572 | FI | + | +/+ |
| 3032 | FI | + | +/+ |
| 3104 | FI | - | -/- |
| 3108 | FI | - | -/- |
| 3161 | HI | - | -/- |
| 3168 | FI | + | +/+ |
| 3178 | HI | - | -/- |
| 3185 | HI | - | -/- |
| 3236 | FI | + | +/+ |
| 3322 | FI | - | -/- |

216 -: non-emetic strains +: emetic strains; \*: cereulide bioassay and *ces* sequencing; FI: food isolate; HI: human isolate;  
 217 EI: environmental isolate

218 <sup>1</sup> Method according to, Wehrle et al. (31)

219 <sup>2</sup> Method according to, Wehrle et al. (30)

220 <sup>3</sup> Biomarkers (*m/z* 1171 and 1187 Da) detectable (+) or not detectable (-)

221

222 **Table 3:** Summary of the differentiation between emetic and non-emetic *B. cereus* reference strains by  
 223 MALDI-TOF MS and comparison with results of previous characterization by bioassays/PCR

| Strain    | Species                      | Origin | MALDI-TOF MS <sup>3</sup> | Bioassay <sup>1</sup> */PCR <sup>2</sup> * |
|-----------|------------------------------|--------|---------------------------|--------------------------------------------|
| DSM 2301  | <i>B. cereus</i>             | FI     | -                         | -/-                                        |
| DSM 4222  | <i>B. cereus</i>             | HI     | -                         | -/-                                        |
| DSM 4282  | <i>B. cereus</i>             | FI     | -                         | -/-                                        |
| DSM 4312  | <i>B. cereus</i>             | FI     | +                         | +/+                                        |
| DSM 4384  | <i>B. cereus</i>             | FI     | -                         | -/-                                        |
| DSM 8438  | <i>B. cereus</i>             | FI     | -                         | -/-                                        |
| DSM 11821 | <i>B. weihenstephanensis</i> | FI     | -                         | -/-                                        |
| DSM 22905 | <i>B. cytotoxicus</i>        | FI     | -                         | -/-                                        |

224 -: non-emetic strains +: emetic strains; \*: cereulide bioassay and *ces* sequencing; FI: food isolate; HI: human isolate

225 <sup>1</sup> Method according to, Wehrle et al. (31)

226 <sup>2</sup> Method according to, Wehrle et al. (30)

227 <sup>3</sup> Biomarkers (*m/z* 1171 and 1187 Da) detectable (+) or not detectable (-)

228

229 In order to assess the limit of detection for pure toxin, a synthetic cereulide standard was measured in  
 230 different concentrations (Figure 3). The limit of detection for pure cereulide standard was 1.0 µg/ml  
 231 when following the described sample preparation protocol.

232

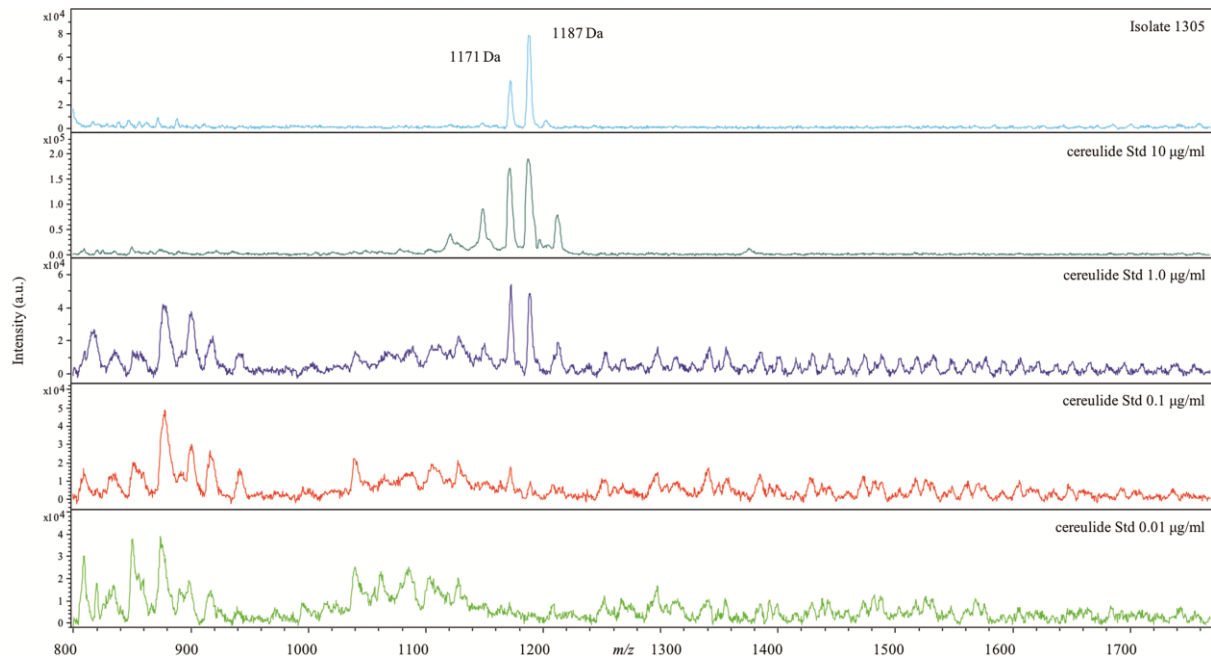

233  
 234 **Figure 3:** Measurement of synthetic cereulide standard in different concentrations compared to an  
 235 emetic *B. cereus* strain (MHI 1305)

236  
 237 As several previous studies have pointed out that there is a great variability in the toxin productivity of  
 238 emetic *B. cereus* strains, we additionally analyzed four low-producing *B. cereus* isolates (Table 4).  
 239 Apart from the isolate IH 41385 which is well-known for its extremely low productivity, probably  
 240 caused by a point mutation in the *ces* gene (26), all other analyzed low-producing isolates were  
 241 correctly identified as emetic *B. cereus* with the established MALDI-TOF technique (Table 4).

**Table 4:** Toxin productivity of low-producing *B. cereus* isolates according to previous publications  
 and in house data. Apart from isolate IH 41385, well-known for its extremely low toxin  
 productivity, all other isolates were correctly identified by MALDI-TOF as cereulide  
 producers.

| <i>B. cereus</i> | Toxin productivity<br>(ng cereulide/mg<br>biomass fresh wt.) <sup>1</sup> | MS signal<br>intensity (a.u.) <sup>2</sup> | Cytotoxic<br>activity<br>(reciprocal<br>titer) <sup>3</sup> | MALDI-<br>TOF<br>results |
|------------------|---------------------------------------------------------------------------|--------------------------------------------|-------------------------------------------------------------|--------------------------|
| <b>Isolates</b>  |                                                                           |                                            |                                                             |                          |
| IH 41385         | 0.5 -1                                                                    | traces                                     | < 10                                                        | negative                 |
| RIVM BC379       | 7 - 9                                                                     | < 50                                       | 76                                                          | positive                 |
| UHDAM B315       | 50 - 90                                                                   | > 200                                      | 143                                                         | positive                 |

|           |      |      |         |          |
|-----------|------|------|---------|----------|
| RIVM BC51 | n.d. | < 50 | > 1,000 | positive |
|-----------|------|------|---------|----------|

#### Control strains

|                         |           |       |         |          |
|-------------------------|-----------|-------|---------|----------|
| DSM 4312<br>(F 4810/72) | 240 - 600 | > 150 | > 1,000 | positive |
| MHI 1305                | 170 - 200 | > 75  | 230     | positive |

a.u.: arbitrary units

<sup>1</sup> Data are from Carlin et al. (32); *B. cereus* was grown on TSA plates and biomass was extracted with methanol

<sup>2</sup> Data are from Stark et al. (26); *B. cereus* was enriched in LB broth, and cell pellets were extracted with ethanol

<sup>3</sup> In-house data; *B. cereus* was enriched in skimmed milk medium. The autoclaved broth was analyzed by a cytotoxicity assay based on HEp-2 cells (33)

242

#### 243 Discussion

244 *B. cereus* is abundant in the environment and, thus, is frequently found in food. Low levels of  
245 *B. cereus* cells or spores are found on virtually every raw agricultural commodity. Particularly, herbs  
246 and other food material that have direct contact with soil are at high risk for contamination with  
247 *B. cereus* (7, 34). Due to their food poisoning potential higher levels of *B. cereus* in food constitute a  
248 public health hazard and represent a major problem for the food industry. This applies particularly to  
249 the emetic strains capable of producing high amounts of the heat-stable cereulide in food. Depending  
250 on the food category investigated, prevalence rates for emetic strains show a broad variability,  
251 percentages in the range from <1 % in vegetables to >20 % in farinaceous products have been reported  
252 (12, 15, 35). To improve HACCP based concepts and prevent foodborne intoxications by emetic *B.*  
253 *cereus* it is necessary to identify the currently unknown entrance-points into the food production (6).  
254 This requires novel diagnostic strategies as morphological or microscopic approaches are nearly  
255 useless for the differentiation of emetic and non-emetic *B. cereus* strains (33). Identification of emetic  
256 strains is currently only possible by complex and sophisticated methods such as PCR, bioassays or  
257 mass spectrometry (6, 14, 23, 26, 28).

258 In contrary, MALDI-TOF MS can be used as a fast screening method for routine microbiological  
259 analysis since minimal sample pretreatment is required. Therefore, this technique appears quite as a



260 preferable method for the differentiation of emetic and non-emetic strains. However, up to now, only  
261 one study has been published in which the applicability of this technique to this purpose was evaluated  
262 (28). In principle the authors used an indirect approach by measuring differences in the mass spectra  
263 profiles in positive linear ionization mode in the range of  $m/z$  4000 – 12000 Da. Ultimately, after  
264 analyzing more than 100 *B. cereus* isolates, the authors stated that proteomic profiling of whole cells  
265 by MALDI-TOF MS is not a sufficiently reliable method to distinguish emetic and non-emetic *B.*  
266 *cereus*.

267 Therefore, in the present study a direct approach to differentiate between emetic and non-emetic  
268 strains was chosen. Obviously, the direct approach has the limitation of being dependent on the  
269 production of cereulide on the culture medium and the temperature used for cultivation. If a strain has  
270 the ability to produce cereulide but does not produce cereulide on an agar plate, the result of the  
271 MALDI-TOF MS measurement would be false negative. In principle, like previously described for  
272 many other bacterial toxins, cereulide production depends strongly on the growth and enrichment  
273 conditions applied (12, 36). For the evaluation of the toxin productivity of emetic *B. cereus* strains, in  
274 earlier studies the bacteria were grown on tryptic soy agar (TSA) plates for up to ten days at 28 °C and  
275 then the biomass was extracted by organic solvents (37). A more rapid approach was used by Stark et  
276 al. (26) in which isolates were precultured in LB broth (TSB) and then enriched overnight at 24 °C.  
277 However, the subsequent extraction of the cell pellet took up to 17 h. While both these culture media  
278 resulted in high toxin amounts, no toxin productivity could be observed in other media such as BHI  
279 and peptone broth commonly used for the enrichment of bacteria (38). Less known is that blood agar  
280 plates also represent an excellent medium for cereulide production (39). Therefore, in our approach,  
281 bacterial cultures were directly measured from the blood agar plate and the detection of cereulide  
282 positive/negative samples could be performed within 5 minutes.

283 Comparing the detected mass peaks of the cereulide standard (Figure 3) with the mass peaks ( $m/z$   
284 1171 and 1187 Da, Figure 2) found after analyzing whole cells of emetic strains, it is fairly certain that  
285 these mass peaks represent the cereulide produced by the strains. Overall, the method worked very  
286 well, 109 out of 110 tested *B. cereus* strains/isolates were correctly identified. Only one emetic strain  
287 (IH 41385, Table 4) reacted false negative in the MALDI-TOF MS. This particular strain is well-



288 known for its extremely low productivity (26, 32). Considering the toxin dosis needed to induce  
289 emesis, i.e. 8 µg cereulide per kg body weight (40), it is highly unlikely that such low-producer strains  
290 represent a public health hazard.

291 In conclusion, the developed method is characterized by a high inclusivity of >99 % and a striking  
292 simplicity. Theoretically a strain may produce cereulide in a food matrix but not on a blood agar plate  
293 (41). However, in our analyses including a comprehensive range of emetic *B. cereus* strains from  
294 different sources we found no indication for this scenario. Whether the method is equally suited for  
295 detection of cereulide in other bacteria of the *B. cereus* group, e.g. *B. weihenstephanensis*, has to be  
296 further investigated (42, 43). Future research may also reveal if a modified version of the presented  
297 method is additionally applicable for the identification of the diarrheal toxins, i.e. Hbl or Nhe  
298 produced by *B. cereus*.

299

## 300 **References**

- 301 1. Vos P, Garrity G, Jones D, Krieg NR, Ludwig W, Rainey FA, Schleifer K-H,  
302 Whitman W. 2011. *Bergey's Manual of Systematic Bacteriology: Volume 3: The Firmicutes*,  
303 vol 3. Springer Science & Business Media.
- 304 2. Miller RA, Jian J, Beno SM, Wiedmann M, Kovac J. 2018. Intraclade Variability in  
305 Toxin Production and Cytotoxicity of *Bacillus cereus* Group Type Strains and Dairy-  
306 Associated Isolates. *Appl Environ Microbiol* 84.
- 307 3. Clavel T, Carlin F, Lairon D, Nguyen-The C, Schmitt P. 2004. Survival of *Bacillus*  
308 *cereus* spores and vegetative cells in acid media simulating human stomach. *J Appl Microbiol*  
309 97:214-9.
- 310 4. Bottone EJ. 2010. *Bacillus cereus*, a volatile human pathogen. *Clin Microbiol Rev*  
311 23:382-98.
- 312 5. European Centre for Disease Prevention and Control. 2013. The European Union  
313 Summary Report on Trends and Sources of Zoonoses, Zoonotic Agents and Food-borne  
314 Outbreaks in 2011. *EFSA Journal* 11:3129.

- 315 6. Messelhauser U, Frenzel E, Blochinger C, Zucker R, Kampf P, Ehling-Schulz M.  
316 2014. Emetic *Bacillus cereus* are more volatile than thought: recent foodborne outbreaks and  
317 prevalence studies in Bavaria (2007-2013). *Biomed Res Int* 2014:465603.
- 318 7. Stenfors Arnesen LP, Fagerlund A, Granum PE. 2008. From soil to gut: *Bacillus*  
319 *cereus* and its food poisoning toxins. *FEMS Microbiol Rev* 32:579-606.
- 320 8. Schoeni JL, Wong AC. 2005. *Bacillus cereus* food poisoning and its toxins. *J Food*  
321 *Prot* 68:636-48.
- 322 9. Ehling-Schulz M, Vukov N, Schulz A, Shaheen R, Andersson M, Martlbauer E,  
323 Scherer S. 2005. Identification and partial characterization of the nonribosomal peptide  
324 synthetase gene responsible for cereulide production in emetic *Bacillus cereus*. *Appl Environ*  
325 *Microbiol* 71:105-13.
- 326 10. Haggblom MM, Apetroaie C, Andersson MA, Salkinoja-Salonen MS. 2002.  
327 Quantitative Analysis of Cereulide, the Emetic Toxin of *Bacillus cereus*, Produced under  
328 Various Conditions. *Applied and Environmental Microbiology* 68:2479-2483.
- 329 11. Marxen S, Stark TD, Frenzel E, Rutschle A, Lucking G, Purstinger G, Pohl EE,  
330 Scherer S, Ehling-Schulz M, Hofmann T. 2015. Chemodiversity of cereulide, the emetic toxin  
331 of *Bacillus cereus*. *Anal Bioanal Chem* 407:2439-53.
- 332 12. Ehling-Schulz M, Frenzel E, Gohar M. 2015. Food-bacteria interplay:  
333 pathometabolism of emetic *Bacillus cereus*. *Front Microbiol* 6:704.
- 334 13. in't Veld PH, van der Laak LFJ, van Zon M, Biesta-Peters EG. 2018. Elaboration and  
335 validation of the method for the quantification of the emetic toxin of *Bacillus cereus* as  
336 described in EN-ISO 18465 - Microbiology of the food chain – Quantitative determination of  
337 emetic toxin (cereulide) using LC-MS/MS. *International Journal of Food Microbiology*  
338 doi:<https://doi.org/10.1016/j.ijfoodmicro.2018.03.021>.
- 339 14. Rønning HT, Asp TN, Granum PE. 2015. Determination and quantification of the  
340 emetic toxin cereulide from *Bacillus cereus* in pasta, rice and cream with liquid

- 341 chromatography–tandem mass spectrometry. *Food Additives & Contaminants: Part A* 32:911-  
342 921.
- 343 15. Delbrassinne L, Andjelkovic M, Dierick K, Denayer S, Mahillon J, Van Loco J. 2012.  
344 Prevalence and levels of *Bacillus cereus* emetic toxin in rice dishes randomly collected from  
345 restaurants and comparison with the levels measured in a recent foodborne outbreak.  
346 *Foodborne Pathog Dis* 9:809-14.
- 347 16. Tschiedel E, Rath PM, Steinmann J, Becker H, Dietrich R, Paul A, Felderhoff-Muser  
348 U, Dohna-Schwake C. 2015. Lifesaving liver transplantation for multi-organ failure caused by  
349 *Bacillus cereus* food poisoning. *Pediatr Transplant* 19:E11-4.
- 350 17. Posfay-Barbe KM, Schrenzel J, Frey J, Studer R, Korff C, Belli DC, Parvex P,  
351 Rimensberger PC, Schappi MG. 2008. Food poisoning as a cause of acute liver failure.  
352 *Pediatr Infect Dis J* 27:846-7.
- 353 18. Dierick K, Van Coillie E, Swiecicka I, Meyfroidt G, Devlieger H, Meulemans A,  
354 Hoedemaekers G, Fourie L, Heyndrickx M, Mahillon J. 2005. Fatal family outbreak of  
355 *Bacillus cereus*-associated food poisoning. *J Clin Microbiol* 43:4277-9.
- 356 19. Naranjo M, Denayer S, Botteldoorn N, Delbrassinne L, Veys J, Waegenaere J, Sirtaine  
357 N, Driesen RB, Sipido KR, Mahillon J, Dierick K. 2011. Sudden death of a young adult  
358 associated with *Bacillus cereus* food poisoning. *J Clin Microbiol* 49:4379-81.
- 359 20. Mahler H, Pasi A, Kramer JM, Schulte P, Scoging AC, Bar W, Krahenbuhl S. 1997.  
360 Fulminant liver failure in association with the emetic toxin of *Bacillus cereus*. *N Engl J Med*  
361 336:1142-8.
- 362 21. Castiaux V, N'Guessan E, Swiecicka I, Delbrassinne L, Dierick K, Mahillon J. 2014.  
363 Diversity of pulsed-field gel electrophoresis patterns of cereulide-producing isolates of  
364 *Bacillus cereus* and *Bacillus weihenstephanensis*. *FEMS Microbiol Lett* 353:124-31.

- 365 22. Fricker M, Messelhauser U, Busch U, Scherer S, Ehling-Schulz M. 2007. Diagnostic  
366 real-time PCR assays for the detection of emetic *Bacillus cereus* strains in foods and recent  
367 food-borne outbreaks. *Appl Environ Microbiol* 73:1892-8.
- 368 23. Ehling-Schulz M, Fricker M, Scherer S. 2004. Identification of emetic toxin producing  
369 *Bacillus cereus* strains by a novel molecular assay. *FEMS Microbiology Letters* 232:189-195.
- 370 24. Ehling-Schulz M, Guinebretiere MH, Monthan A, Berge O, Fricker M, Svensson B.  
371 2006. Toxin gene profiling of enterotoxic and emetic *Bacillus cereus*. *FEMS Microbiol Lett*  
372 260:232-40.
- 373 25. Beattie SH, Williams AG. 1999. Detection of toxigenic strains of *Bacillus cereus* and  
374 other *Bacillus* spp. with an improved cytotoxicity assay. *Lett Appl Microbiol* 28:221-5.
- 375 26. Stark T, Marxen S, Rutschle A, Lucking G, Scherer S, Ehling-Schulz M, Hofmann T.  
376 2013. Mass spectrometric profiling of *Bacillus cereus* strains and quantitation of the emetic  
377 toxin cereulide by means of stable isotope dilution analysis and HEp-2 bioassay. *Anal Bioanal*  
378 *Chem* 405:191-201.
- 379 27. Clark AE, Kaleta EJ, Arora A, Wolk DM. 2013. Matrix-assisted laser desorption  
380 ionization-time of flight mass spectrometry: a fundamental shift in the routine practice of  
381 clinical microbiology. *Clin Microbiol Rev* 26:547-603.
- 382 28. Fiedoruk K, Daniluk T, Fiodor A, Drewicka E, Buczynska K, Leszczynska K, Bideshi  
383 DK, Swiecicka I. 2016. MALDI-TOF MS portrait of emetic and non-emetic *Bacillus cereus*  
384 group members. *Electrophoresis* 37:2235-47.
- 385 29. Meetani MA, Voorhees KJ. 2005. MALDI mass spectrometry analysis of high  
386 molecular weight proteins from whole bacterial cells: pretreatment of samples with  
387 surfactants. *J Am Soc Mass Spectrom* 16:1422-6.
- 388 30. Wehrle E, Didier A, Moravek M, Dietrich R, Martlbauer E. 2010. Detection of  
389 *Bacillus cereus* with enteropathogenic potential by multiplex real-time PCR based on SYBR  
390 Green I. *Mol Cell Probes* 24:124-30.

- 391 31. Wehrle E, Moravek M, Dietrich R, Burk C, Didier A, Martlbauer E. 2009.  
392 Comparison of multiplex PCR, enzyme immunoassay and cell culture methods for the  
393 detection of enterotoxinogenic *Bacillus cereus*. J Microbiol Methods 78:265-70.
- 394 32. Carlin F, Fricker M, Pielaat A, Heisterkamp S, Shaheen R, Salonen MS, Svensson B,  
395 Nguyen-the C, Ehling-Schulz M. 2006. Emetic toxin-producing strains of *Bacillus cereus*  
396 show distinct characteristics within the *Bacillus cereus* group. Int J Food Microbiol 109:132-  
397 8.
- 398 33. Ehling-Schulz M, Svensson B, Guinebretiere MH, Lindback T, Andersson M, Schulz  
399 A, Fricker M, Christiansson A, Granum PE, Martlbauer E, Nguyen-The C, Salkinoja-Salonen  
400 M, Scherer S. 2005. Emetic toxin formation of *Bacillus cereus* is restricted to a single  
401 evolutionary lineage of closely related strains. Microbiology 151:183-97.
- 402 34. Ceuppens S, Boon N, Uyttendaele M. 2013. Diversity of *Bacillus cereus* group strains  
403 is reflected in their broad range of pathogenicity and diverse ecological lifestyles. FEMS  
404 Microbiol Ecol 84:433-50.
- 405 35. Biesta-Peters EG, Dissel S, Reij MW, Zwietering MH, in't Veld PH. 2016.  
406 Characterization and Exposure Assessment of Emetic *Bacillus cereus* and Cereulide  
407 Production in Food Products on the Dutch Market. J Food Prot 79:230-8.
- 408 36. Kranzler M, Stollewerk K, Rouzeau-Szynalski K, Blayo L, Sulyok M, Ehling-Schulz  
409 M. 2016. Temperature Exerts Control of *Bacillus cereus* Emetic Toxin Production on Post-  
410 transcriptional Levels. Frontiers in Microbiology 7.
- 411 37. Andersson M, Mikkola R, Helin J, Andersson M, Salkinoja-Salonen M. 1998. A  
412 Novel Sensitive Bioassay for Detection of *Bacillus cereus* Emetic Toxin and Related  
413 Depsipeptide Ionophores. Applied and Environmental Microbiology 64:1338-1343.
- 414 38. Finlay WJJ, Logan NA, Sutherland AD. 2000. *Bacillus cereus* produces most emetic  
415 toxin at lower temperatures. Letters in Applied Microbiology 31:385-389.

- 416 39. Jääskeläinen EL, Teplova V, Andersson MA, Andersson LC, Tammela P, Andersson  
417 MC, Pirhonen TI, Saris NEL, Vuorela P, Salkinoja-Salonen MS. 2003. In vitro assay for  
418 human toxicity of cereulide, the emetic mitochondrial toxin produced by food poisoning  
419 *Bacillus cereus*. *Toxicology in Vitro* 17:737-744.
- 420 40. Isobe M, Ishikawa T, Suwan S, Agata N, Ohta M. 1995. Synthesis and Activity of  
421 Cereulide, a Cyclic Dodecadepsipeptide Ionophore as Emetic Toxin from *Bacillus cereus*.  
422 *Bioorganic & Medicinal Chemistry Letters* 5:2855-2858.
- 423 41. Rajkovic A, Uyttendaele M, Ombregt S-A, Jaaskelainen E, Salkinoja-Salonen M,  
424 Debevere J. 2006. Influence of Type of Food on the Kinetics and Overall Production of  
425 *Bacillus cereus* Emetic Toxin. *Journal of Food Protection* 69:847-852.
- 426 42. Thorsen L, Hansen BM, Nielsen KF, Hendriksen NB, Phipps RK, Budde BB. 2006.  
427 Characterization of emetic *Bacillus weihenstephanensis*, a new cereulide-producing  
428 bacterium. *Appl Environ Microbiol* 72:5118-21.
- 429 43. Guerin A, Ronning HT, Dargaignaratz C, Clavel T, Broussolle V, Mahillon J, Granum  
430 PE, Nguyen-The C. 2017. Cereulide production by *Bacillus weihenstephanensis* strains  
431 during growth at different pH values and temperatures. *Food Microbiol* 65:130-135.
- 432
- 433

| Mass Peak | p-value<br>t-test/ANOVA | Average<br>intensity<br>class 1<br>(a. u.) | Average<br>intensity<br>class 2<br>(a. u.) | Standard<br>Deviation<br>class 1<br>(%) | Standard<br>Deviation<br>class 2<br>(%) | Receiver<br>Operating<br>Characteristic<br>(AUC) |
|-----------|-------------------------|--------------------------------------------|--------------------------------------------|-----------------------------------------|-----------------------------------------|--------------------------------------------------|
| 1171      | <0.05                   | 1.26                                       | 6.6                                        | 0.53                                    | 2.96                                    | 0.99                                             |
| 1187      | <0.05                   | 1.11                                       | 11.32                                      | 0.33                                    | 6.72                                    | 1.00                                             |

a.u.: arbitrary units; AUC: Area under curve

| No. (MHI) | Origin | MALDI-TOF<br>MS <sup>3</sup> | Bioassay <sup>1</sup> /PCR <sup>2*</sup> |
|-----------|--------|------------------------------|------------------------------------------|
| 86        | FI     | -                            | -/-                                      |
| 184       | EI     | +                            | +/+                                      |
| 280       | FI     | +                            | +/+                                      |
| 1326      | HI     | +                            | +/+                                      |
| 1471      | FI     | +                            | +/+                                      |
| 1475      | FI     | -                            | -/-                                      |
| 1476      | FI     | -                            | -/-                                      |
| 1477      | FI     | -                            | -/-                                      |
| 1478      | FI     | -                            | -/-                                      |
| 1479      | FI     | -                            | -/-                                      |
| 1481      | FI     | -                            | -/-                                      |
| 1482      | FI     | -                            | -/-                                      |
| 1483      | FI     | -                            | -/-                                      |
| 1484      | EI     | -                            | -/-                                      |
| 1485      | FI     | +                            | +/+                                      |
| 1486      | FI     | +                            | +/+                                      |
| 1487      | HI     | +                            | +/+                                      |
| 1489      | FI     | -                            | -/-                                      |
| 1490      | FI     | -                            | -/-                                      |
| 1491      | FI     | -                            | -/-                                      |
| 1492      | FI     | -                            | -/-                                      |
| 1493      | FI     | -                            | -/-                                      |
| 1494      | FI     | -                            | -/-                                      |
| 1495      | FI     | -                            | -/-                                      |
| 1496      | FI     | -                            | -/-                                      |
| 1497      | FI     | -                            | -/-                                      |
| 1499      | FI     | -                            | -/-                                      |
| 1500      | FI     | -                            | -/-                                      |
| 1501      | FI     | -                            | -/-                                      |
| 1502      | FI     | -                            | -/-                                      |
| 1503      | FI     | -                            | -/-                                      |
| 1508      | FI     | -                            | -/-                                      |
| 1509      | FI     | -                            | -/-                                      |
| 1510      | FI     | -                            | -/-                                      |
| 1511      | FI     | -                            | -/-                                      |
| 1512      | FI     | -                            | -/-                                      |
| 1513      | FI     | -                            | -/-                                      |
| 1514      | FI     | -                            | -/-                                      |
| 1515      | FI     | +                            | +/+                                      |
| 1516      | FI     | -                            | -/-                                      |
| 1517      | FI     | +                            | +/+                                      |
| 1518      | FI     | -                            | -/-                                      |
| 1519      | FI     | -                            | -/-                                      |
| 1520      | FI     | -                            | -/-                                      |



|      |    |   |     |
|------|----|---|-----|
| 1521 | FI | - | -/- |
| 1522 | FI | - | -/- |
| 1523 | FI | - | -/- |
| 1524 | FI | - | -/- |
| 1525 | FI | - | -/- |
| 1526 | FI | - | -/- |
| 1527 | FI | - | -/- |
| 1528 | FI | + | +/+ |
| 1529 | FI | - | -/- |
| 1530 | FI | - | -/- |
| 1531 | FI | - | -/- |
| 1532 | FI | - | -/- |
| 1533 | FI | + | +/+ |
| 1534 | FI | + | +/+ |
| 1535 | FI | + | +/+ |
| 1538 | FI | + | +/+ |
| 1542 | FI | + | +/+ |
| 1548 | HI | + | +/+ |
| 1549 | FI | + | +/+ |
| 1550 | HI | + | +/+ |
| 1553 | FI | + | +/+ |
| 1559 | FI | + | +/+ |
| 1562 | HI | + | +/+ |
| 1566 | HI | + | +/+ |
| 1567 | HI | + | +/+ |
| 1568 | HI | - | -/- |
| 1569 | HI | + | +/+ |
| 1571 | HI | + | +/+ |
| 1654 | EI | + | +/+ |
| 1664 | FI | + | +/+ |
| 1665 | FI | + | +/+ |
| 1670 | FI | - | -/- |
| 1672 | FI | + | +/+ |
| 1673 | FI | + | +/+ |
| 1678 | FI | - | -/- |
| 1699 | FI | + | +/+ |
| 1701 | HI | + | +/+ |
| 1745 | FI | + | +/+ |
| 1885 | EI | - | -/- |
| 2011 | HI | + | +/+ |
| 2049 | HI | + | +/+ |
| 2058 | HI | + | +/+ |
| 2350 | FI | - | -/- |
| 2507 | FI | - | -/- |
| 2572 | FI | + | +/+ |
| 3032 | FI | + | +/+ |

|      |    |   |     |
|------|----|---|-----|
| 3104 | FI | - | -/- |
| 3108 | FI | - | -/- |
| 3161 | HI | - | -/- |
| 3168 | FI | + | +/+ |
| 3178 | HI | - | -/- |
| 3185 | HI | - | -/- |
| 3236 | FI | + | +/+ |
| 3322 | FI | - | -/- |

-: non-emetic strains +: emetic strains; \*: cereulide bioassay and *ces* sequencing; FI: food isolate; HI: human isolate;

EI: environmental isolate

<sup>1</sup> Method according to, Wehrle et al. (31)

<sup>2</sup> Method according to, Wehrle et al. (30)

<sup>3</sup> Biomarkers (*m/z* 1171 and 1187 Da) detectable (+) or not detectable (-)

| Strain    | Species                            | Origin | MALDI-TOF<br>MS <sup>3</sup> | Bioassay <sup>1*</sup> /PCR <sup>2*</sup> |
|-----------|------------------------------------|--------|------------------------------|-------------------------------------------|
| DSM 2301  | <i>B. cereus</i>                   | FI     | -                            | -/-                                       |
| DSM 4222  | <i>B. cereus</i>                   | HI     | -                            | -/-                                       |
| DSM 4282  | <i>B. cereus</i>                   | FI     | -                            | -/-                                       |
| DSM 4312  | <i>B. cereus</i>                   | FI     | +                            | +/+                                       |
| DSM 4384  | <i>B. cereus</i>                   | FI     | -                            | -/-                                       |
| DSM 8438  | <i>B. cereus</i>                   | FI     | -                            | -/-                                       |
| DSM 11821 | <i>B. weihen-<br/>stephanensis</i> | FI     | -                            | -/-                                       |
| DSM 22905 | <i>B. cytotoxicus</i>              | FI     | -                            | -/-                                       |

-: non-emetic strains +: emetic strains; \*: cereulide bioassay and *ces* sequencing; FI: food isolate; HI: human isolate

<sup>1</sup> Method according to, Wehrle et al. (31)

<sup>2</sup> Method according to, Wehrle et al. (30)

<sup>3</sup> Biomarkers (*m/z* 1171 and 1187 Da) detectable (+) or not detectable (-)

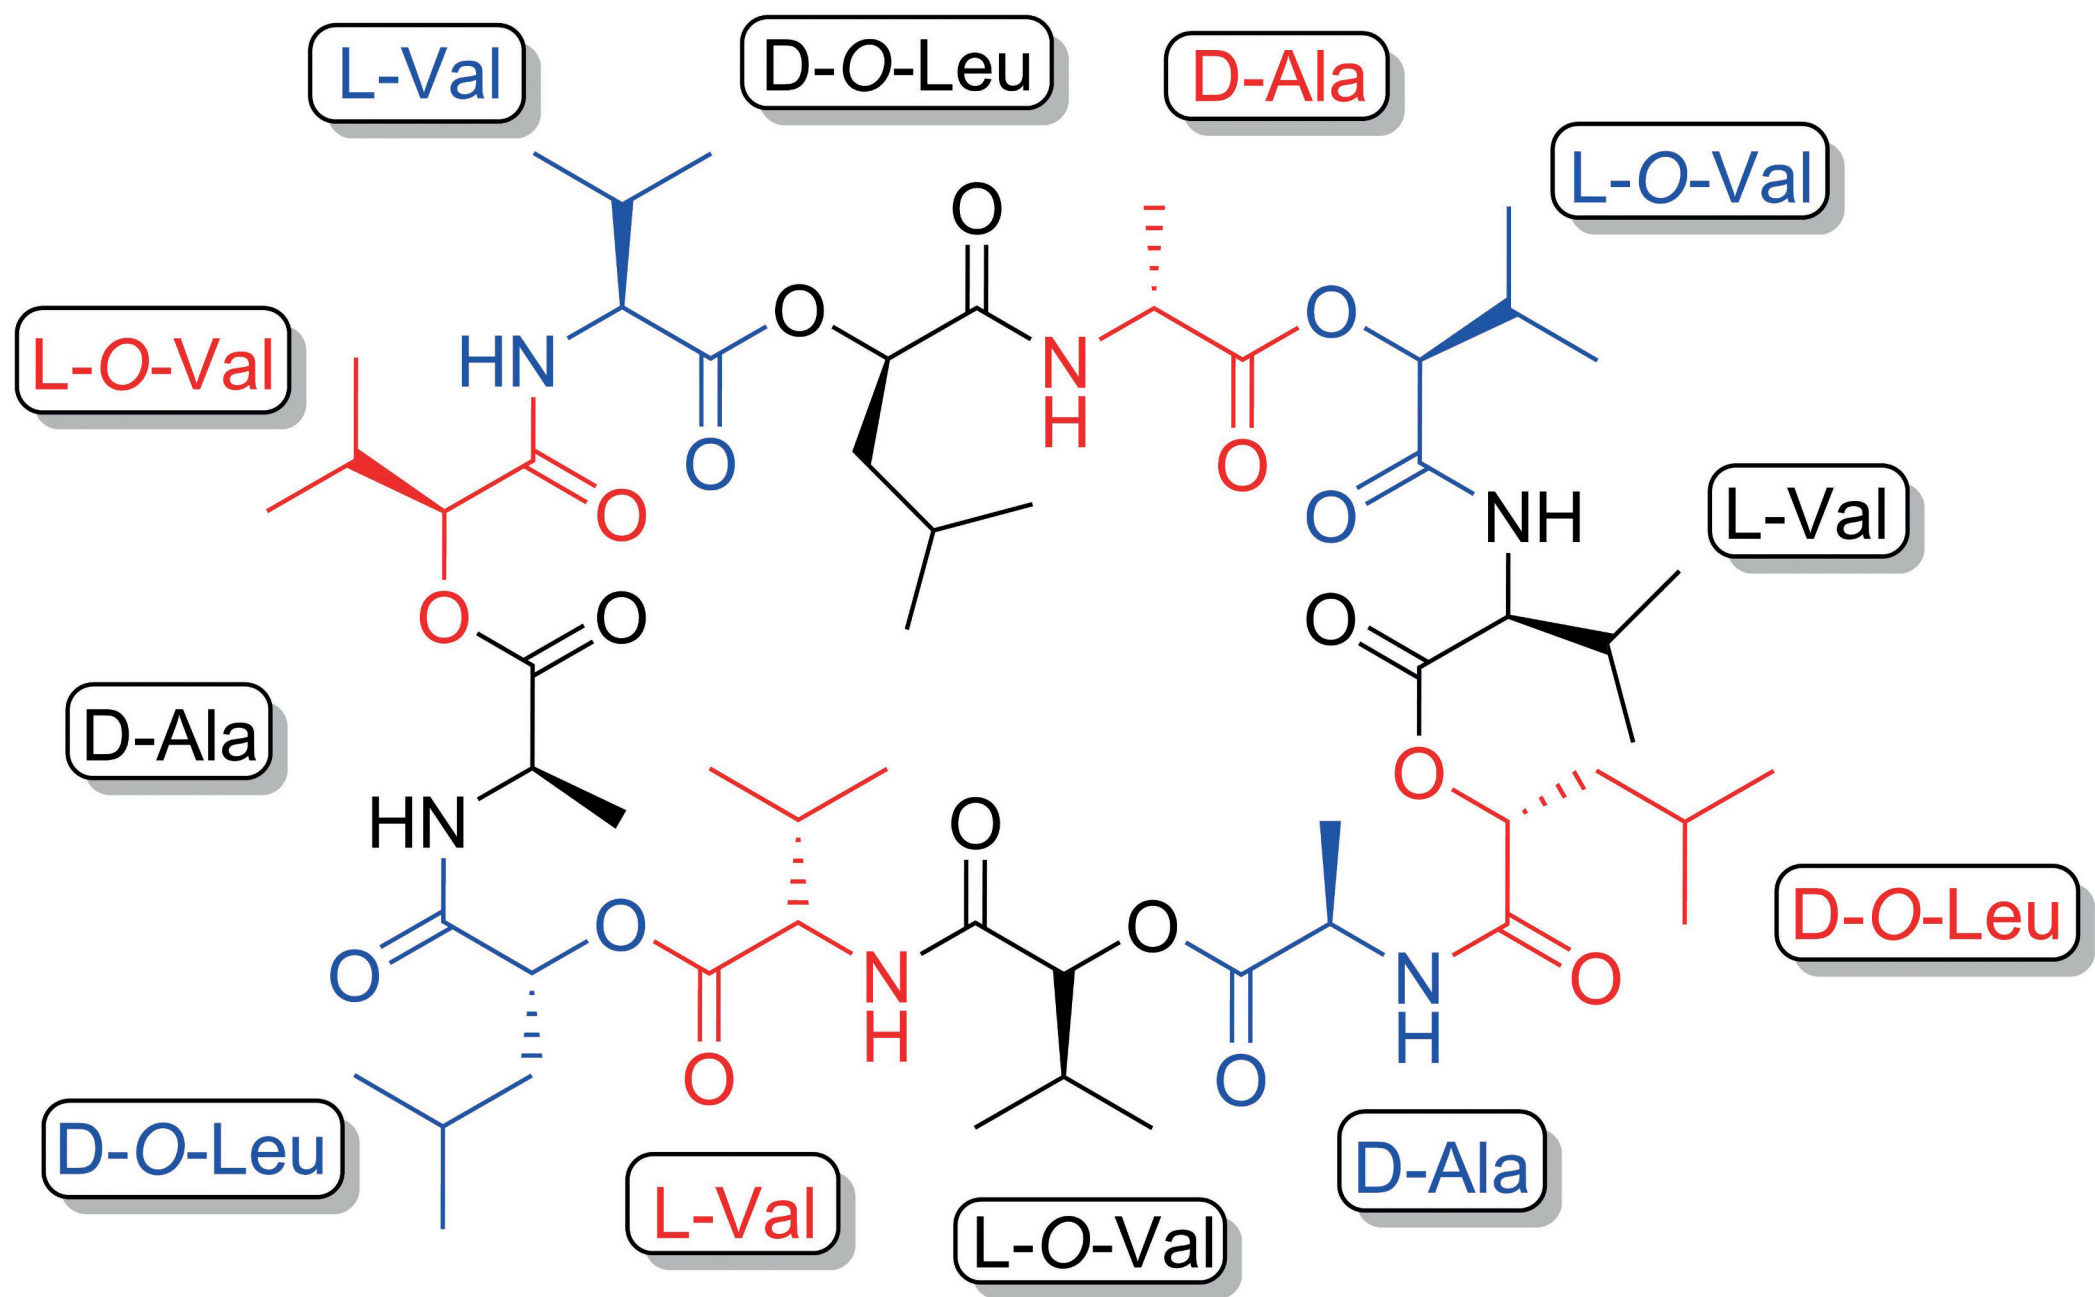

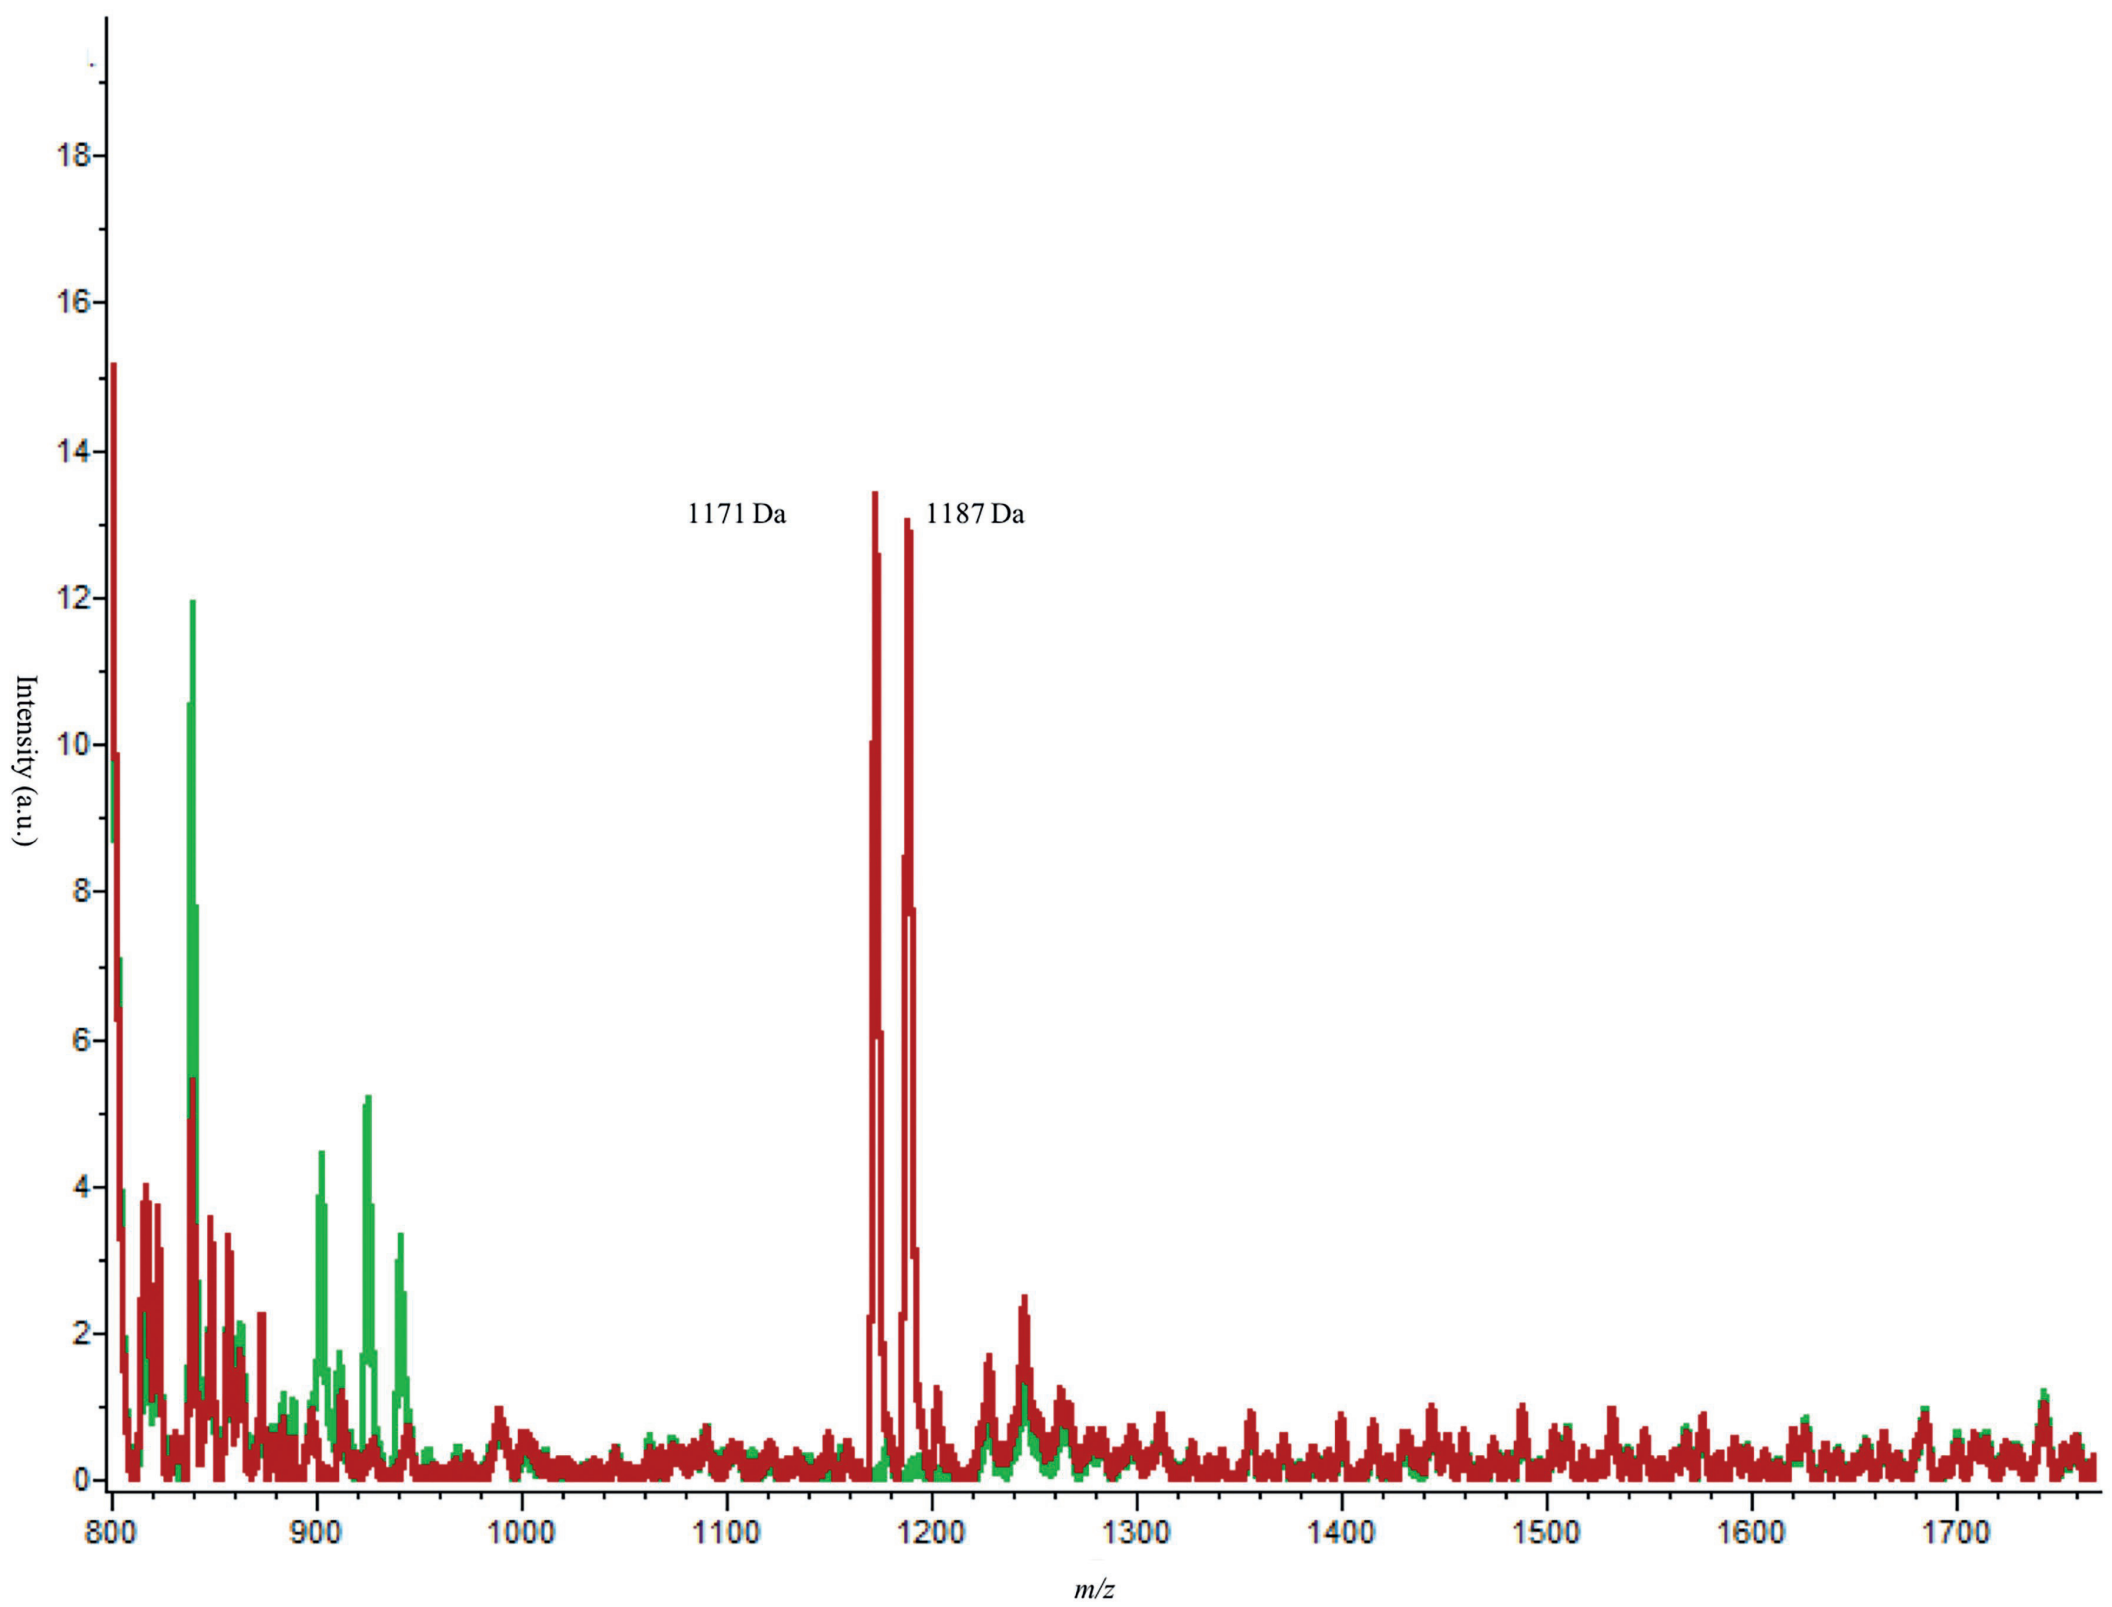



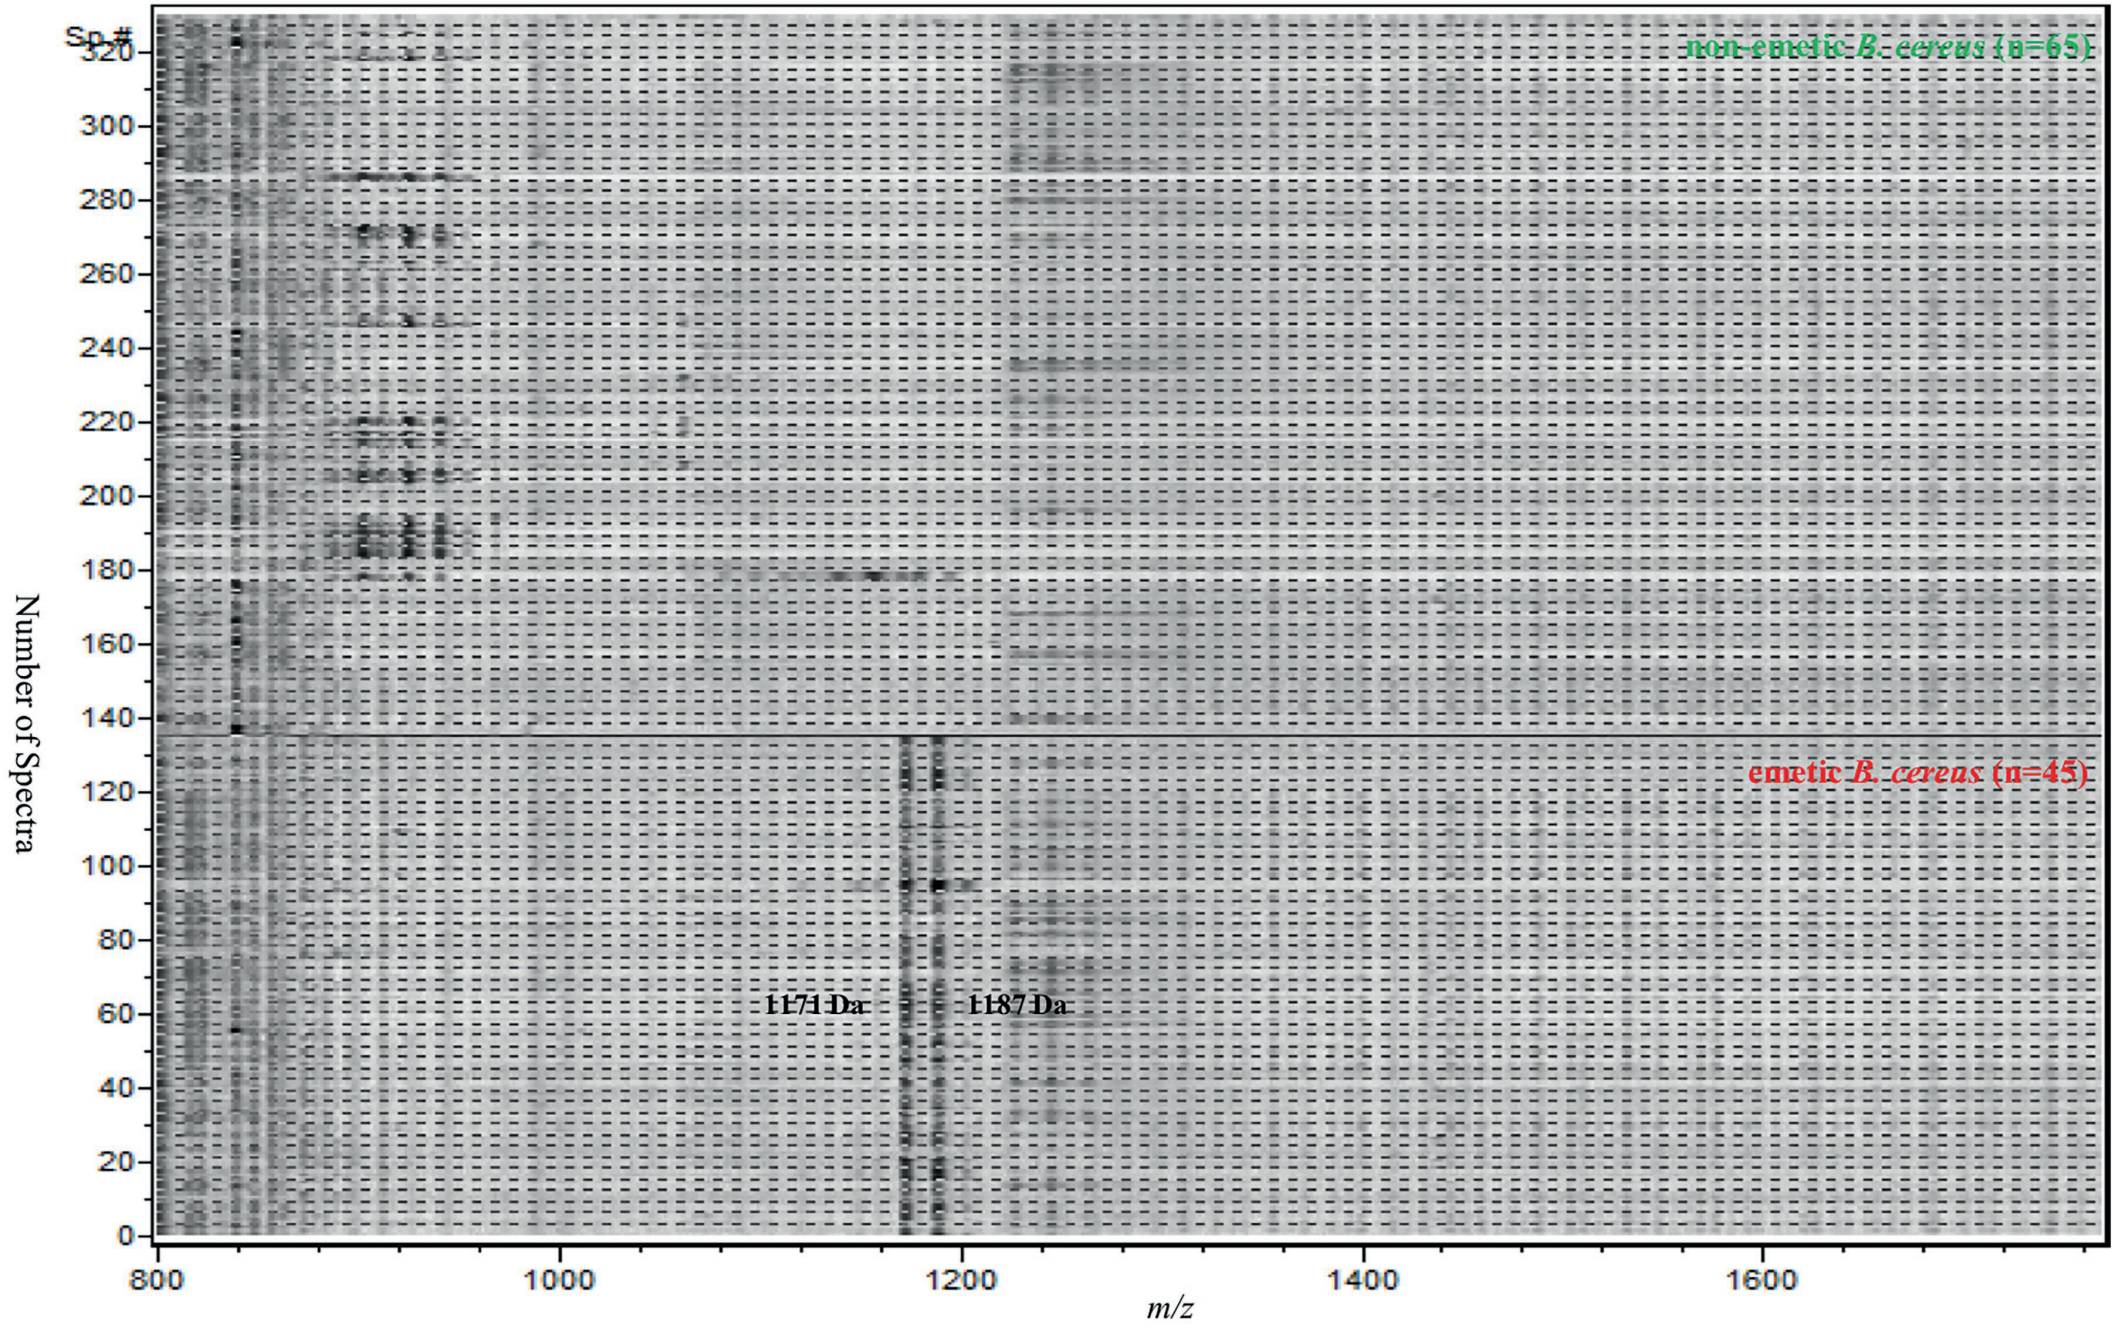



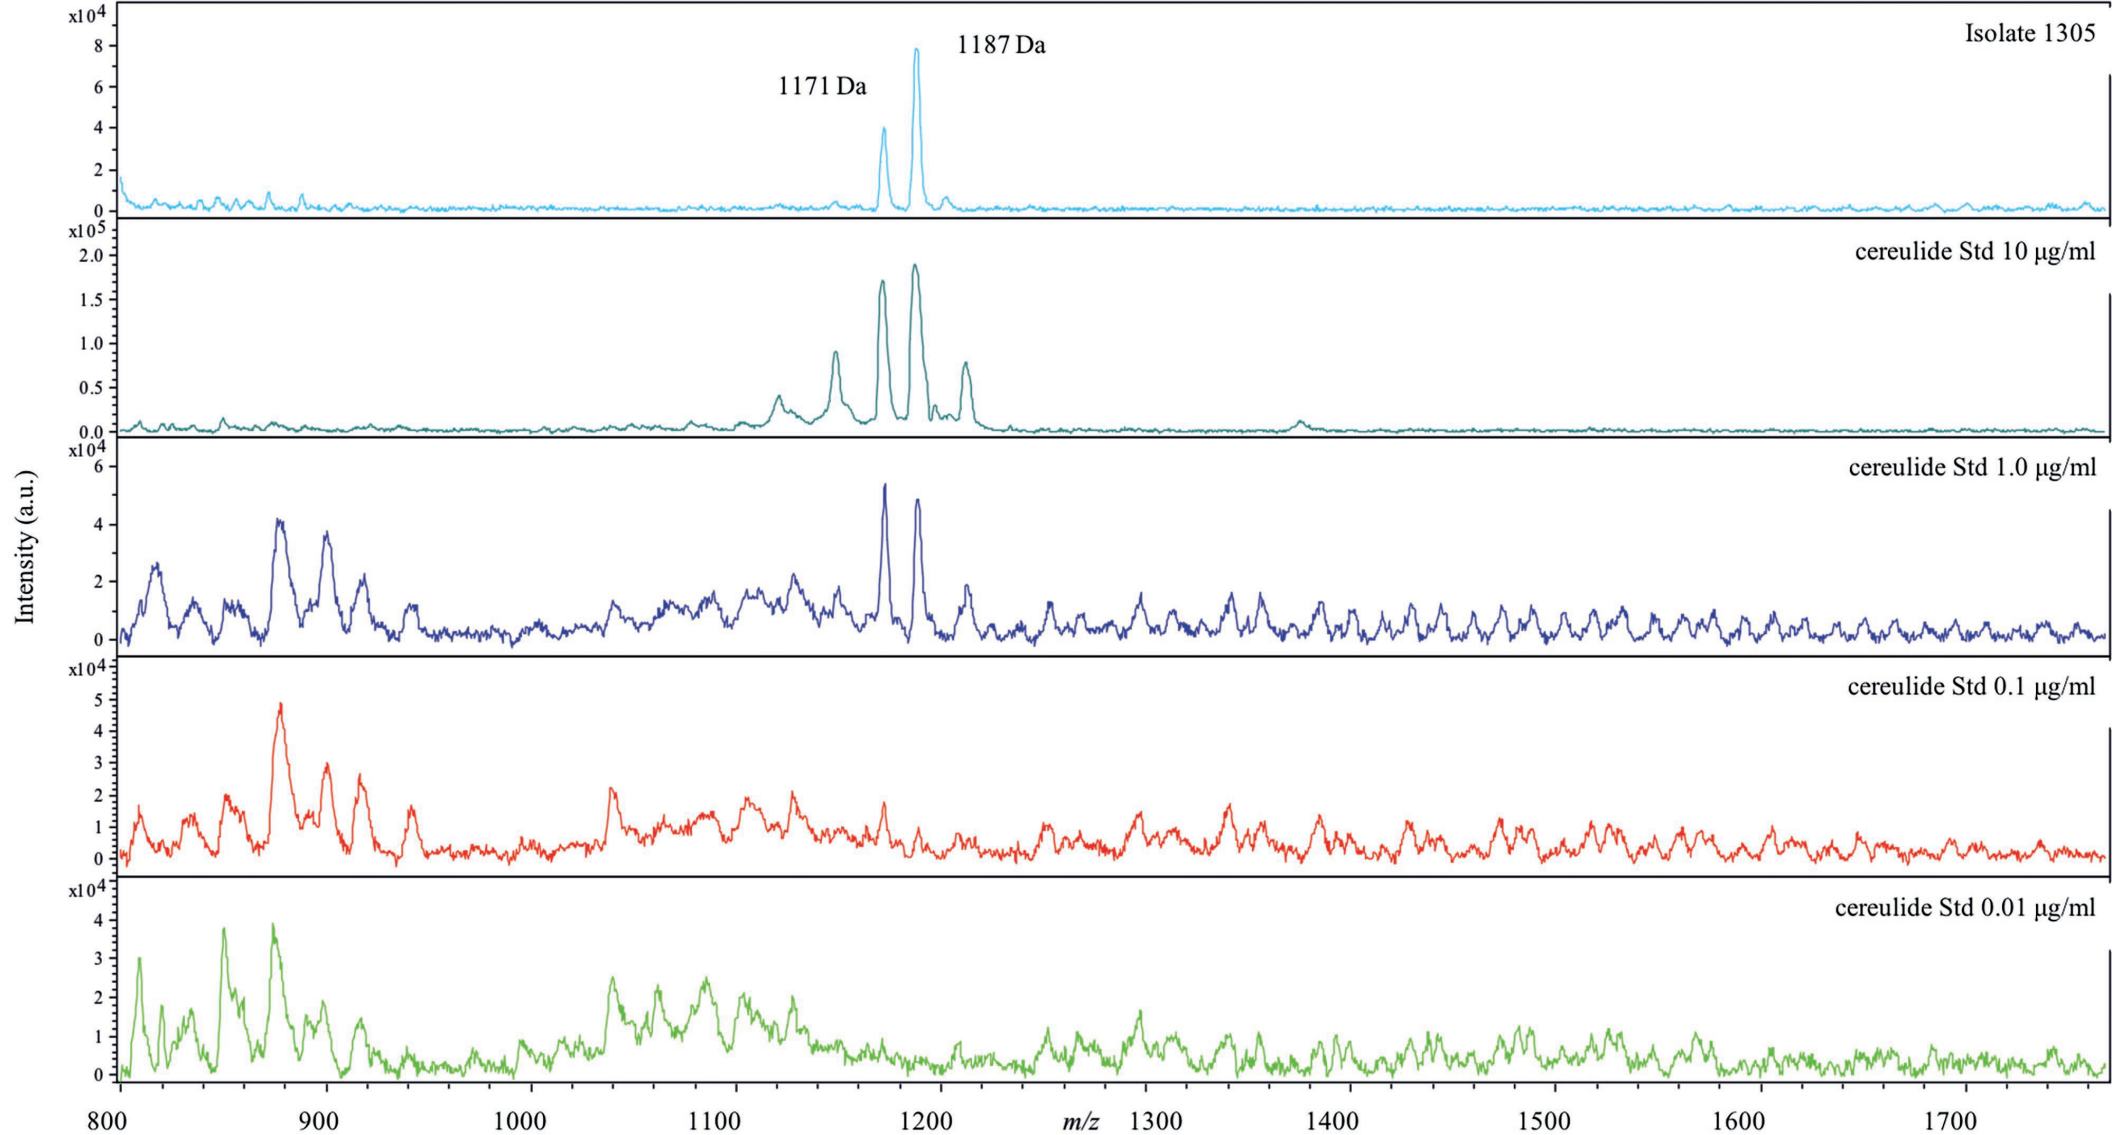

Source: https://www.biorxiv.org/content/biorxiv/early/2018/05/18/324756.full.pdf
